# Supplementary material for: Development of a bioactive hyaluronic acid hydrogel functionalised with antimicrobial peptides for the treatment of chronic wounds
Source: Royal Society of Chemistry journal article supplement (doi:10.1039/d5bm00567a), 2025-01-01
Supplement: d5bm00567a1.zip [file d5bm00567a1.zip]

**Supplementary Information**

**Fig. S1. 1H NMR characterisation of functionalised AcHyA reveals a reduction in acrylate groups, indicating conjugation of the AMP**.

**Fig. S2.** **Incorporation of PP4-3.1 AMP into AcHyA-G hydrogels with 0.5% gelatin supports cellular adhesion and growth of HDFs and iECs without compromising biocompatibility.** Confocal images of the hydrogels seeded with (A) HDFs and (B) iECs after 7 days in culture. Scale bar is 100 μm.

**Fig. S3.** **Characterisation of AcHyA-AMP hydrogels reveals stable mechanical properties.** (A) storage modulus and (B) swelling ratio. Data represents mean ± SD (n=3). Analysis performed using unpaired, two-tailed t-test; *p* < 0.05.

**Fig. S4.** **The incorporation of the AMP influences the degradation profile of AcHyA-AMP hydrogels.** Characterisation of antimicrobial HyA hydrogels. (A-C) hydrolytic degradation (PBS) and (D-F) enzymatic degradation (10 U/mL HyAse). Data represents mean ± SD (n = 3). Analysis performed using two-way ANOVA; *p* < 0.05.
